# Supplementary material
Source: PubMed Central journal article supplement (PMC6702079)
Supplement: NIHMS1528002-supplement-1.pdf [file NIHMS1528002-supplement-1.pdf]

**Appendix**  
**Dual Versus Never Use of E-cigarettes Among American Indians Who Smoke**  
**Rhoades et al.**

**Appendix Table 1.** The Hooked on Nicotine Checklist (HONC)<sup>46</sup>

|                                                                                                | No | Yes |
|------------------------------------------------------------------------------------------------|----|-----|
| 1. Have you ever tried to quit, but couldn't                                                   |    |     |
| 2. Do you smoke <u>now</u> because it is really hard to quit?                                  |    |     |
| 3. Have you ever felt like you were addicted to tobacco?                                       |    |     |
| 4. Do you ever have strong cravings to smoke?                                                  |    |     |
| 5. Have you ever felt like you really needed a cigarette?                                      |    |     |
| 6. Is it hard to keep from smoking in places where you are not supposed to?                    |    |     |
| <b><i>When you haven't used tobacco for a while...OR When you tried to stop smoking...</i></b> |    |     |
| 7. Did you find it hard to concentrate because you couldn't smoke?                             |    |     |
| 8. Did you feel more irritable because you couldn't smoke?                                     |    |     |
| 9. Did you feel a strong need or urge to smoke?                                                |    |     |
| 10. Did you feel nervous, restless or anxious because you couldn't smoke?                      |    |     |
| Score:                                                                                         |    |     |

Scoring: No = 0; Yes = 1.

**Appendix**  
**Dual Versus Never Use of E-cigarettes Among American Indians Who Smoke**  
**Rhoades et al.**

**Appendix Table 2.** The Penn State Cigarette Dependence Index<sup>48</sup>

1. How many cigarettes per day do you usually smoke? (Scoring: 0-4 times/day = 0, 5-9 = 1, 10-14 = 2, 15-19 = 3, 20-29 = 4, 30+ = 5)
2. On days that you can smoke freely, how soon after you wake up do you smoke your first cigarette of the day? (Scoring: 0-5 minutes = 5, 6-15 = 4, 16-30 = 3, 31-60 = 2, 61-120 = 1, 121+ = 0)
3. Do you sometimes awaken at night to have a cigarette? (Yes = 1, No = 0)
4. If yes, how many nights per week do you typically awaken to smoke? (Scoring 0-1 nights = 0, 2-3 nights = 1, 4+ nights = 2)
5. Do you smoke now because it is really hard to quit? (Yes = 1, No = 0)
6. Do you ever have strong cravings to smoke? (Yes = 1, No = 0)
7. Over the past week, how strong have the urges to smoke been? (Scoring: None/slight = 0, Moderate/Strong = 1, Very Strong/Extremely strong = 2)
8. Is it hard to keep from smoking in places where you are not supposed to, such as restaurants, hospital/clinics, or other public areas? (Yes = 1, No = 0)
- When you haven't used tobacco for a while or when you tried to stop smoking...**
9. Did you feel more irritable because you couldn't smoke? (Yes = 1, No = 0)
10. Did you feel nervous, restless, or anxious because you couldn't smoke? (Yes = 1, No = 0).
